# Supplementary material
Source: publisher figshare collection journal article supplement (https://springernature.figshare.com/ndownloader/files/15364253)
Supplement: Supplementary file 1 [file 15364253]

Additional file 1: ADRs leading to death.

| **Sex** | **Age** | **Primary disease** | **Disease stage** | **Complications** | **ADR where the outcome was death** | **Other factors** | **Time to onset (days)** | **Time to observed outcome (days)** |
| --- | --- | --- | --- | --- | --- | --- | --- | --- |
| F | 77 | Diabetic nephropathy | HD | Hyperparathyroidism secondary  Gastroesophageal reflux disease  Nail infection  Hyperphosphatemia  Cerebral infarction  Insomnia  Hypertension | Thalamus hemorrhage | Others (unknown) | 155 | 15 |
| M | 73 | Others (nephrosis) | HD | Arrhythmia  Myocardial infarction  Hypertension | Cardiac failure | Due to complications and previous disease history (complications/heart disease/myocardial infarction) | 208 | 33 |
| M | 57 | Diabetic nephropathy | HD | Diabetic retinopathy  Diabetes mellitus  Epilepsy  Insomnia  Hypertension  Peripheral arterial occlusive disease | Drowning | Due to complications and previous disease history (complications/brain disease/others/symptomatic epilepsy), due to concurrent medication and/or therapy (course of treatment/Levemir, course of treatment/NovoRapid) | 117 | 1 |
| F | 47 | Chronic glomerulonephritis | PD | Hypertension | Death | Due to primary disease | 883 | 1 |
| F | 24 | Others (polycystic kidney) | HD |  | Death | Others (details unknown) | 41 | Unknown |
| M | 78 | Diabetic nephropathy | ND | Hepatitis C  Diabetes mellitus  Hyperuricemia  Hypokalemia  Benign prostatic hyperplasia  Hypertension | Cerebrovascular disorder | Due to primary disease | 237 | 2 |
| F | 58 | Diabetic nephropathy | HD | Aplastic anemia  Cardiac hypertrophy  Hyperparathyroidism secondary  Gastric ulcer  Diabetes mellitus  Hypertension | Cerebral hemorrhage |  | 319 | 4 |
| M | 77 | Chronic glomerulonephritis | ND | Arrhythmia | Pulmonary alveolar hemorrhage | Due to primary disease | 76 | 28 |
| Hyperlipidemia | Vasculitis | Due to primary disease | 76 | 28 |
| Hypertension |  |  |  |  |
| M | 80 | Nephrosclerosis | ND | Hypertension | Sudden cardiac death | Due to primary disease | 172 | 1 |
| M | 83 | Diabetic nephropathy | ND | Angina pectoris | Dizziness | Due to complications and previous disease history (complications/hypertension) | 85 | 163 |
| Cardiac failure | Cerebral infarction | Due to complications and previous disease history (complications/hypertension) | 85 | 163 |
| Diabetes mellitus |  |  |  |  |
| Hyperlipidemia |
| Dementia |
| Hypertension |
| M | 73 | Nephrosclerosis | ND | Hyperparathyroidism secondary | Death | Other (cause is unknown, but acute myocardial infarction is suspected) | 136 | 1 |
| Chronic gastritis |
| Diarrhea |
| Hyperlipidemia |
| Hypertonic bladder |
| Hypertension |
| F | 65 | Chronic glomerulonephritis | HD | Hypertension | Cerebral hemorrhage | Due to complications and previous disease history (complications/hypertension) | 379 | 9 |
| M | 82 | Others (unknown) | ND | Anemia vitamin B12 deficiency  Aortic valve stenosis  Cardiac failure  Cardiac hypertrophy  Drug-induced liver injury  Pneumonia  Subdural hematoma  Spinal osteoarthritis  Cerebral hemorrhage  Cerebral infarction  Epilepsy  Brain edema  Hypertension | Subdural hematoma | Due to primary disease, due to complications and previous disease history (complications/hypertension), due to concurrent medication and/or therapy (course of treatment/ Bayaspirin, course of treatment/ Plavix) | 160 | 67 |
| F | 50 | Chronic glomerulonephritis | HD | Hypertension | Aortic aneurysm rupture | Due to complications and previous disease history (previous disease history/heart disease/others/aortic aneurysm) | 316 | 1 |
| F, female, HD, hemodialysis; M, male; ND, not on dialysis; PD, peritoneal dialysis. | | | | | | | | |
